# Supplementary material
Source: PubMed Central journal article supplement (PMC6544383)
Supplement: NIHMS1529699-supplement-1.pdf [file NIHMS1529699-supplement-1.pdf]

## Supplemental Information

### **Acetate Promotes T Cell Effector Function during Glucose Restriction**

**Jing Qiu, Matteo Villa, David E. Sanin, Michael D. Buck, David O'Sullivan, Reagan Ching, Mai Matsushita, Katarzyna M. Grzes, Frances Winkler, Chih-Hao Chang, Jonathan D. Curtis, Ryan L. Kyle, Nikki Van Teijlingen Bakker, Mauro Corrado, Fabian Haessler, Francesca Alfei, Joy Edwards-Hicks, Leonard B. Maggi Jr., Dietmar Zehn, Takeshi Egawa, Bertram Bengsch, Ramon I. Klein Geltink, Thomas Jenuwein, Edward J. Pearce, and Erika L. Pearce**

## **SUPPLEMENTARY FIGURES AND TABLES**

Figure S1

Figure S2

Figure S3

Table S1

Figure S1 (Related to Figure 1)

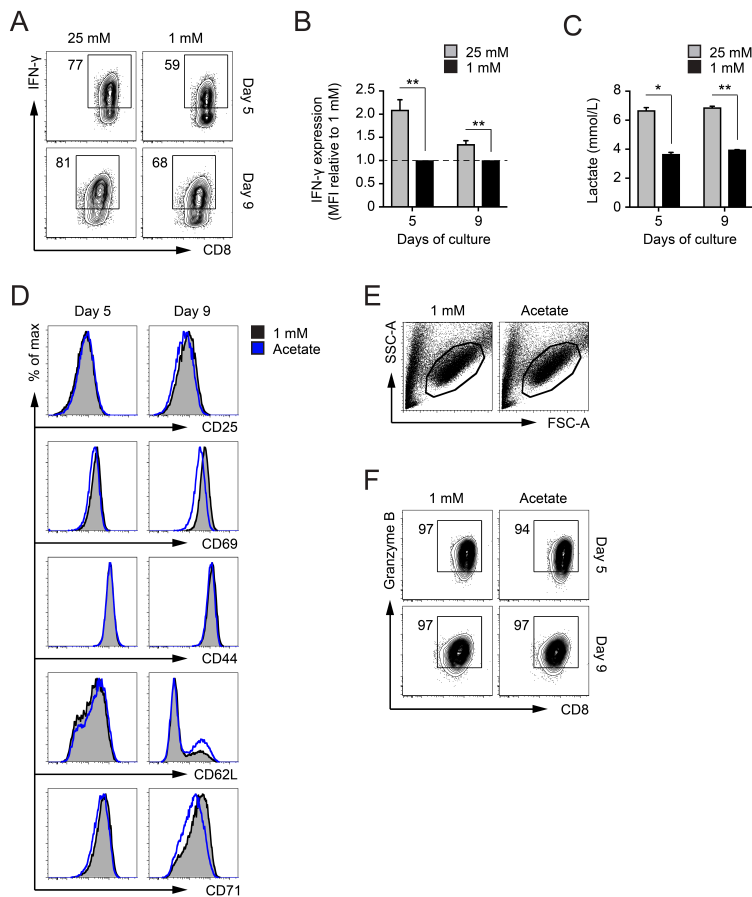

**Figure S1. While promoting IFN- $\gamma$  production, acetate does not affect expression of surface markers, granzyme B, or cell size of glucose-restricted T cells. Related to Figure 1.**

**A**, FACS analysis of IFN- $\gamma$  production by T cells cultured continuously for 5 or 9 days in 25 mM glucose or switched to 1 mM glucose on day 3 and cultured as described in Fig. 1A. Numbers show percentage of IFN- $\gamma^+$  cells. FACS plots are representative of  $n=3$  independent experiments. **B**, Quantification of IFN- $\gamma$  production as MFI of the CD8 $^+$  population as shown in A. Values were normalized to the 1 mM condition. Mean  $\pm$  SEM; Student's  $t$  test;  $n=3$  independent experiments. **C**, Quantification of lactate production, as measure of aerobic glycolysis, in the medium of cells cultured for 24 hours in the indicated conditions. Mean  $\pm$  SEM;  $n=3$  independent experiments. **D**, FACS analysis of surface expression of the indicated markers on T cells cultured as described in Fig. 1A. FACS plots show representative data of  $n=2$  independent experiments. **E**, FACS analysis of the physical parameters forward scatter (FSC, indicating cell size) and side scatter (SSC, indicating the cell shape complexity) of T cells cultured as in Fig. 1A. Analysis was performed at day 5 post-activation. No previous gating strategy was applied before plotting FSC and SSC. The gate indicates the FSC/SSC gate used throughout the manuscript for further analysis. **F**, FACS analysis of Granzyme B production by T cells cultured as described in Fig. 1A. Numbers show percentage of Granzyme B $^+$  cells. FACS plots are representative of  $n=2$  independent experiments.

Figure S2 (Related to Figure 2)

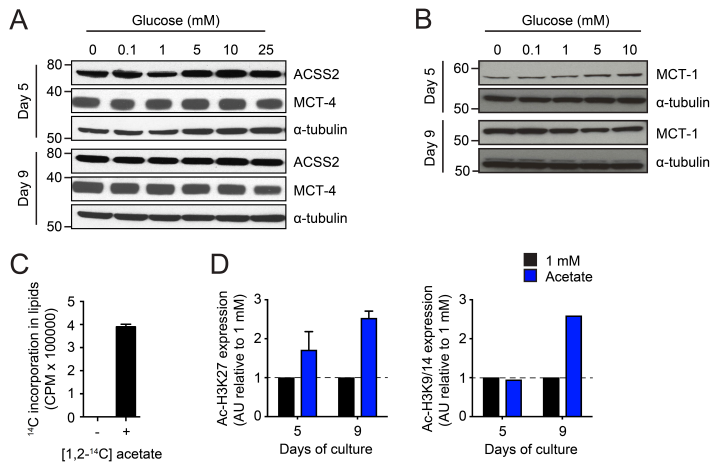

**Figure S2. Acetate is incorporated into lipids and histones of glucose-restricted T cells. Related to Figure 2.**

**A**, Western blot analysis of ACSS-2 and MCT-4 in T cells cultured in different glucose concentrations. Data are representative of  $n=3$  (for ACSS2) and  $n=1$  (for MCT-4) independent experiments. **B**, Western blot analysis of MCT-1 in T cells cultured in different glucose concentrations. Data are representative of  $n=1$  experiment. **C**, Quantification of [1,2- $^{14}\text{C}$ ] acetate-derived  $^{14}\text{C}$  incorporation in lipids extracted from T cells cultured in 10 mM glucose media. Mean  $\pm$  SEM;  $n=2$  independent experiments. **D**, Quantification of western blots of H3K9/14 and H3K27 acetylation in T cells treated as described in Fig. 1A. Data are representative of  $n=2$  ( $n=1$  for Ac-H3K9/14) independent experiments.



Figure S3 (Related to Figure 4)

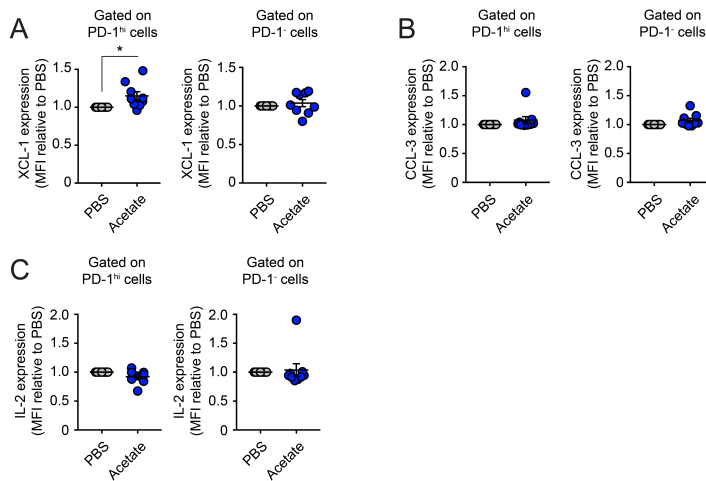

Figure S3. Chemokine and cytokine expression in PBMCs isolated from the blood of patients chronically infected with hepatitis C virus (HCV). Cells were treated overnight with either PBS or 5 mM acetate. Data show MFI of the indicated parameters. Values are normalized to the PBS counterparts. Mean  $\pm$  SEM; Paired Student's *t* test; data from n=9 donors.

A-C, Chemokine and cytokine expression in PBMCs isolated from the blood of patients chronically infected with hepatitis C virus (HCV). Cells were treated overnight with either PBS or 5 mM acetate. Data show MFI of the indicated parameters. Values are normalized to the PBS counterparts. Mean  $\pm$  SEM; Paired Student's *t* test; data from n=9 donors.

Table S1 (Related to Figure 3)

**A**

|               |               |         |           |             |
|---------------|---------------|---------|-----------|-------------|
| 1600020E01Rik | Dlgap1        | Gm23701 | Myo1d     | Slnf10-ps   |
| 1700072G22Rik | Dmrt2os       | Gm2453  | Nampt     | Smarcd3     |
| 201011101Rik  | Dnah3         | Gm24819 | Ndfip2    | Snx20       |
| 2610306M01Rik | Dnajb6        | Gm25283 | Nebi      | Spes3       |
| 2900011008Rik | Dnajc5b       | Gm25505 | Nkx1-1    | Spice1      |
| 4921523L03Rik | Dnase1l3      | Gm25916 | No10      | Srek1ip1    |
| 4930447M23Rik | Dnm1t         | Gm26686 | Notch2    | Srsia1      |
| 4930519F16Rik | Dock10        | Gm26827 | Nr4a3     | Slk40       |
| 4930555B11Rik | Dock6         | Gm27007 | Nrns      | Srsf8       |
| 4930565D16Rik | Dok6          | Gm37549 | Oma1      | Syde2       |
| 5031415H12Rik | E130102H24Rik | Gm38122 | Oxsr1     | Syne1       |
| 5730508B09Rik | E330017L17Rik | Gm38130 | P2ry2     | Tbc1d31     |
| 9130204K15Rik | Ebf1          | Gm38337 | Pak6      | Tcof1       |
| A330074K22Rik | Eci2          | Gm42791 | Patl2     | Tctex1d1    |
| A930006K02Rik | Efcab2        | Gm5544  | Pdcd10    | Tec         |
| Abi1          | Erf2ak3       | Gm7895  | Pear1     | Tespa1      |
| Adam32        | Emb           | Gm8926  | Pgk1      | Tg          |
| Add3          | Erc6l2        | Gna13   | Phlpp1    | Tmem19      |
| Akap13        | Fam105a       | Gng2    | Pim3      | Tmem229b-ps |
| Aldh18a1      | Fam1178b      | Gjrl132 | Plac5     | Tmem70      |
| Angel1        | Fam49a        | H3f3a   | Plydc2    | Tnfrsf8     |
| Ankrd44       | Fbln1         | Haao    | Por       | Trav15n-1   |
| Ankrd50       | Fbxl20        | Hbs1l   | Ppm1h     | Trim69      |
| Aph1a         | Fbxo32        | Hmgb3   | Ppp6r1    | Trpm8       |
| Arhgap10      | Fcamr         | Hmgcs2  | Prex1     | Ttc27       |
| Ar14a         | Fcrl5         | Iffng1  | Prkch     | Uba7        |
| Art2a-ps      | Fcrl6         | Iqsec1  | Psmtd14   | Uba2        |
| Asxl1         | Fhad1         | Itpkb   | Ptgs2os2  | Ubash3b     |
| Atg9a         | Fhl2          | Itpri   | Ptpn1     | Ublcp1      |
| Bbx           | Focad         | Katnal1 | Ptpn5     | Ubr2        |
| Bcl9          | Foxo2         | Katn1   | Ptprj     | Ucp3        |
| Bhlhe40       | Frg1          | Kcnd3   | Rab31     | Utrn        |
| Bod1          | Fuom          | Kcnh6   | Ralgapa2  | Vps29b      |
| C230024C17Rik | Fyn           | Kdm5a   | Ralgs2    | Wdr7        |
| Cacna1b       | Gad1-ps       | Khdclb  | Rasgef1b  | Wls         |
| Cacl1         | Gaint7        | Kif1bp  | Rassf2    | Zochc9      |
| Camk4         | Ggnbp1        | Kif24   | Rbms1     | Zdhc14      |
| Car14         | Glyr1         | Kirrel3 | Rhoq      | Zfand4      |
| Casp3         | Gm11684       | Kihl30  | Rhoq      | Zfp330      |
| Cass4         | Gm12536       | Larp4b  | Ripor2    | Zfp365      |
| Ccdc148       | Gm12694       | Ldocc1  | Rnu5g     | Zfp407      |
| Cd228         | Gm12709       | Lpar4   | Rps2-ps5  | Zfp521      |
| Cd86          | Gm12862       | Lrrcc5d | Rps21     | Zfp629      |
| Cdhr4         | Gm13217       | Maf     | Rtcb      | Zfp677      |
| Celf5         | Gm14569       | Map6    | Scube1    | Zfp697      |
| Chsy1         | Gm14848       | Mcf2l   | Serpina12 | Zmic2       |
| Col15a1       | Gm15407       | Mepe    | Serpina9  | Zzz3        |
| Col9a3        | Gm15848       | Mgat5   | Sid1t     |             |
| Comm7         | Gm16418       | Micald  | Siglecg   |             |
| Cpox          | Gm17767       | Mirt1   | Sik3      |             |
| Crrh2         | Gm20388       | Mllt3   | Sia       |             |
| Dapp1         | Gm20661       | Mirps5  | Sic22a14  |             |
| Def6          | Gm21614       | Mtra    | Sic4a10   |             |
| Dera          | Gm23218       | Mybpc3  | Sicc4a1   |             |

**B**

| Gene Ontology Term                                        | Count | p value     |
|-----------------------------------------------------------|-------|-------------|
| GO:0035335-peptidyl-tyrosine dephosphorylation            | 4     | 0.001630408 |
| GO:0004721-phosphoprotein phosphatase activity            | 7     | 0.002797221 |
| GO:0005085-guanyl-nucleotide exchange factor activity     | 7     | 0.004925604 |
| GO:0006470-protein dephosphorylation                      | 6     | 0.011846165 |
| GO:0005089-Rho guanyl-nucleotide exchange factor activity | 4     | 0.038306049 |
| GO:0016310-phosphorylation                                | 12    | 0.04000219  |
| GO:0004672-protein kinase activity                        | 11    | 0.041832928 |
| GO:0008270-zinc ion binding                               | 18    | 0.042151818 |
| GO:0002250-adaptive immune response                       | 5     | 0.04865825  |
| GO:0043407-negative regulation of MAP kinase activity     | 3     | 0.06691431  |
| GO:0004725-protein tyrosine phosphatase activity          | 4     | 0.073957904 |
| GO:0000166-nucleotide binding                             | 27    | 0.074797927 |
| GO:0004722-protein serine/threonine phosphatase activity  | 3     | 0.096974731 |

**Table S1. Acetate enhances chromatin accessibility of genes associated with T cell signaling. Related to Figure 3.**

**A**, List of the 263 genes associated with the 255 open chromatin peaks resulting from acetate treatment of day 9 glucose-restricted cells, as in Fig. 3B. **B**, Pathway enrichment analysis of the genes indicated in A. Gene ontology terms are listed in order of ascending *p* value and the number of genes associated to each gene ontology term is indicated.
